# 1 **Site-specific PEGylation crosslinking of L-asparaginase subunits to** 2 **improve its therapeutic efficiency**

3  
4 Josell Ramirez-Paz<sup>1</sup>, Manoj Saxena<sup>1</sup>, Louis J. Delinois<sup>1</sup>, Freisa M. Joaquín-Ovalle<sup>1</sup>, Shiru Lin<sup>1</sup>, Zhongfang  
5 Chen<sup>1</sup>, Virginia A. Rojas-Nieves<sup>1</sup>, and Kai Griebenow<sup>1\*</sup>  
6

7 <sup>1</sup>Department of Chemistry, Faculty of Natural Sciences, University of Puerto Rico at Rio Piedras, San Juan,  
8 Puerto Rico, United States  
9

10  
11 \*Corresponding author

12 E-mail: [kai.griebenow@gmail.com](mailto:kai.griebenow@gmail.com) (KG)  
13  
14  
15  
16  
17  
18  
19  
20  
21  
22  
23  
24

## Abstract

L-Asparaginase is an enzyme successfully being used in the treatment of acute lymphoblastic leukemia, acute myeloid leukemia, and non-Hodgkin's lymphoma. However, some disadvantages still limit its full application potential, e.g., allergic reactions, pancreatitis, and blood clotting impairment. Therefore, much effort has been directed at improving its performance. A popular strategy is to randomly conjugate L-asparaginase with mono-methoxy polyethylene glycol, which became a commercial FDA approved formulation widely used in recent years. To improve this formulation by PEGylation, herein we performed cysteine-directed site-specific conjugation of the four L-asparaginase subunits to prevent dissociation-induced loss of activity. The conjugation sites were selected at surface-exposed positions on the protein to avoid affecting the catalytic activity. Three conjugates were obtained using different linear PEGs of 1000, 2000, and 5000 g/mol, with physical properties ranging from a semi-solid gel to a fully soluble state. The soluble-conjugate exhibited higher catalytic activity than the non-conjugated mutant, and the same activity than the native enzyme. Site-specific crosslinking of the L-asparaginase subunits produced a higher molecular weight conjugate compared to the native tetrameric enzyme. This strategy might improve L-asparaginase efficiency for leukemia treatment by reducing glomerular filtration due to the increase in hydrodynamic size thus extending half-live, while at the same time retaining full catalytic activity.

## Keywords

Acute lymphoblastic leukemia, catalytic activity, intramolecular, tetramer, thiol-maleimide.

## 49 Introduction

50 L-Asparaginase is a homo-tetramer enzyme that catalyzes the hydrolysis of asparagine to aspartic acid  
51 and ammonia [1]. Some types of blood cancers, e.g., acute lymphoblastic leukemia and non-Hodgkin  
52 lymphoma need to acquire L-Asn from extracellular sources due to a deficiency in express asparagine  
53 synthetase. L-asparaginase has been used as the main therapeutic agent for more than 40 years to treat leukemia  
54 and lymphoma [2]. Once injected into the bloodstream L-asparaginase maintains the pool of circulating  
55 asparagine under a concentration that affects protein biosynthesis in the malignant cells, without affecting the  
56 normal cells, to eventually promote apoptosis [2-6]. In addition to its medicinal application, L-asparaginase has  
57 been recently studied as a possible solution to reduce the content of acrylamide in cooked food products.  
58 Acrylamide was cataloged as “probably carcinogenic to humans” by the International Agency for Research on  
59 Cancer, besides being a toxin. Treating raw products with L-asparaginase before cooking reduces the main  
60 acrylamide precursor asparagine, which reduces acrylamide content in cooked products [7].

61 The main limitation during medical treatments with L-asparaginase is its inactivation due to degradation  
62 by proteolytic enzymes and anti-asparaginase antibodies developed by the host, which cause rapid serum  
63 clearance of the drug [2-6,8,9]. A common strategy to improve the pharmacokinetics of protein-based drugs is  
64 their modification with polyethylene glycol. PEGylation extends the half-life of proteins by increasing their  
65 molecular weight to retard glomerular filtration, while simultaneously hiding antigenic and proteolytic epitopes  
66 through its known stealth effect [10-12]. A commercial formulation of *E. coli* L-asparaginase II modified with  
67 mono-methoxy polyethylene glycol exhibited about five-fold prolonged blood half-life compared to the non-  
68 modified enzyme in clinical studies, and a significant reduction in the incidence of neutralizing antibodies was  
69 also observed [3-6,13]. Such improvements reduce the frequency of injections and dosage during treatment  
70 [5,6].

71 PEGylation is an efficient method to improve protein pharmacokinetics but is usually accompanied by  
72 adverse effects on the pharmacodynamics [10-12], e.g., an increasing degree of PEGylation is correlated to the  
73 reduction of catalytic activity and substrate affinity due to restriction of protein structural dynamics and steric

74 effects [14,15]. In the case of L-asparaginase catalytic activity was drastically reduced to 8% compared to the  
75 natural enzyme when around half of the lysine residues were PEGylated [16-22]. Furthermore, a clinical study  
76 indirectly revealed that the *in vivo* substrate affinity was affected, since higher concentration of PEGylated L-  
77 asparaginase as compared to the non-modified enzyme was needed to maintain the serum concentration of L-  
78 Asn under  $\sim 10 \mu\text{M}$  [13], which is relevant since the *in vivo* substrate affinity of this enzyme is  $29 \mu\text{M}$  and the  
79 normal steady-state asparagine concentration in serum is around  $60 \mu\text{M}$  [4,23]. Another disadvantage is the  
80 discovery of anti-PEG antibodies due to the high exposure to this polymer that we experience in daily life [24-  
81 26].

82 While it is indisputably necessary to investigate other types of polymers and methods to improve the  
83 pharmacodynamics of protein-based drugs, over two decades of clinical use has established PEGylation as the  
84 most efficient method to extend biopharmaceutics half-life, besides being an affordable technology still evolving  
85 [27]. As for the future of L-asparaginase, new formulations are constantly entering clinical trials [2,3], and there  
86 is convincing evidence of its efficiency for more than 40 years [28,29]. For example, a recombinant form from  
87 *E. coli* recently entered the European market [2]. An attractive way to modify L-asparaginase pharmacokinetics  
88 while at the same time maintaining its pharmacodynamics is by site-specific PEGylation, that is the attachment  
89 of PEG polymers at pre-selected sites on the protein surface [30-33]. By attaching PEGs at specific positions,  
90 one can avoid obstructing the active site and limit the degree of PEGylation to maintain protein structural  
91 dynamics thus to retain full catalytic activity [14,15]. This strategy has been partially validated for L-  
92 asparaginase through PEGylation at its natural disulfide bond without losing catalytic activity, independently of  
93 the PEGs length [34,35].

94 In this work we report for the first time the simultaneous site-specific PEGylation and intramolecular  
95 crosslinking of L-asparaginase subunits at pre-selected canonical cysteines introduced by mutagenesis. The  
96 advantage of this approach is that not only the degree of modification is kept to a minimum in order to retain  
97 catalytic activity, but careful selection of the PEGylation positions also offers the possibility to target potential  
98 proteolytic and immunogenic epitopes. Moreover, the molecular weight was increased at least four-fold

99 compared to the native L-asparaginase with as low as one PEG molecule per protein subunit and this  
100 significantly reduces the chance for glomerular filtration and anti-PEG binding. PEGylation of this  
101 therapeutically important enzyme at canonical amino acids is not reported, even though the conjugation  
102 chemistry at cysteine residues is well known and highly specific [36]. The most convenient way to express  
103 recombinant L-asparaginase is by secretion into the periplasmic space or culture medium [37-40], since  
104 cytoplasmic expression leads to formation of inclusion bodies making the purification tedious [41]. However,  
105 expression of canonical cysteines affects L-asparaginase secretory expression [42]. Herein we were able to  
106 express a double-Cys mutation of L-asparaginase as a secreted product, to later perform the site-specific  
107 crosslinking of the subunits. Our findings will benefit the evolving technological improvement of L-  
108 asparaginase as therapeutic agent by setting the prove-of-concept of this alternative PEGylation strategy.

## 111 **Materials and methods**

### 113 **Materials**

114 The plasmid pET-22b(+) was purchased from Novagen (Darmstadt, Germany). The vector pET22b-  
115 AspII was synthesized by GenScript (Piscataway, NJ, USA). Gibson's assembling kit was purchased from New  
116 England BioLabs (Ipswich, MA, USA). Primers were synthesized and DNA sequencing was performed by  
117 MCLAB (San Francisco, CA, USA). The *E. coli* BL21(DE3) competent cells, yeast extract, tryptone, glycerol,  
118 tris-base, hydrochloric acid, ampicillin, isopropyl  $\beta$ -D-1-thiogalactopyranoside, sucrose,  
119 ethylenediaminetetraacetic acid, magnesium sulfate, vacuum filters, ammonium sulfate, sodium chloride, spin  
120 ultrafiltration filters, potassium phosphate monobasic and dibasic, tris-2-carboxyethyl-phosphine hydrochloric,  
121 5,5'-dithiobis-2-nitrobenzoic acid, dithiothreitol, ethanol absolute, acetic acid glacial, Nessler's reagent,  
122 trichloroacetic acid, L-asparagine, natural and randomly-PEGylated L-asparaginase, and Corning clear-bottom

96-well plates, were purchased from Millipore Sigma (St. Louis, MO, USA). The MonoQ, Superdex 200 10/300 GL, and Sephadex G-25 columns were from GE Healthcare Bio-Sciences (Pittsburgh, PA, USA). The MS standards Cal Mix 3 and Glu-Fib-B1 were purchased from SCIEX (Redwood City, CA, USA). The Bi-MAL-PEG linkers were purchased from Creative PEGWorks (Chapel Hill, NC, USA). The 4-20% gradient polyacrylamide gels were purchased from Bio-Rad (Hercules, CA, USA). The Coomassie Brilliant Blue G-250 dye, and Pierce™ BCA protein assay kit were purchased from Thermo Fisher Scientific (Grand Island, NY, USA). Gel densitometry analysis was performed with Gel Analyzer II by Dr. Istvan Lazar (Copyright 2010).

## Cloning

The *ansB* gene encoding the mature *E. coli* L-asparaginase II along with its natural signaling peptide [43], was synthesized and cloned into the plasmid pET-22b(+) at Nde-I and BamH-I restriction sites to generate the expression vector pET22b-AspII. The L-asparaginase mutants C77S-C105S and A38C-T263C were generated using the Gibson's assembling method [44]. Commercial DNA sequencing was used to verify the constructs.

## Secretory expression

*E. coli* BL21(DE3) competent cells were transformed with pET22b-AspII and grown in terrific broth medium (24 g/l yeast extract, 12 g/l tryptone, 4 ml/l glycerol, 100 mM potassium phosphate buffer pH 7.2, 100 µg/ml of ampicillin), which is suitable for asparaginase extracellular secretion [37]. Cultures were grown to an  $OD_{600nm} \sim 0.200$  and tested for induction with 10, 100, 500, and 1000 µM of isopropyl β-D-1-thiogalactopyranoside (IPTG) harvested 4 h post-induction. Secretion of asparaginase catalytic activity was also followed at 8, 16, and 24 h post-induction.

Secretion into the periplasmic space and culture medium was assayed by measuring the presence of asparaginase catalytic activity in the extracytoplasmic compartments. The culture medium fraction was defined

147 as the total activity found in the clear culture medium supernatant after centrifugation. The periplasmic space  
148 fraction was obtained by osmotic shock as follows. The cell pellet was suspended in osmotic solution 1 (20  
149 %w/v sucrose, 1 mM EDTA, 10 mM Tris-HCl pH 8.5) with 25 ml of solution per gram of pellet, then incubated  
150 at 25°C and 150 rpm for 10 min, and centrifuged at 4°C and 10000xg for 10 min. Immediately thereafter, the  
151 pellet was resuspended in osmotic solution 2 (10 mM MgSO<sub>4</sub> in cold water) with 25 ml of solution per gram of  
152 pellet, then incubated at 4°C and 150 rpm for 10 min, and centrifuged at 4°C and 10000xg for 10 min. The  
153 periplasmic fraction was defined as the total activity found in the supernatants after centrifugation. The specific  
154 asparaginase productivity (U/g) was calculated as the ratio of catalytic activity (U) per biomass weight (g).  
155 Measurements were performed in triplicate. Cultures transformed with the pET-22b(+) plasmid were used as  
156 negative control.

## 158 **Purification**

159 Purification was carried out by anion exchange chromatography [45,46], using a MonoQ 8-ml column  
160 attached to a AKTApurifier-UPC900 FPLC (GE Healthcare Bio-Sciences, USA). L-Asparaginase was extracted  
161 from the periplasmic space as detailed in the previous method section. The crude solution after osmotic shock  
162 was centrifuged and filtered through a 0.22 µm pore-size, then adjusted to pH 8.5 with Tris-HCl buffer. The  
163 MonoQ column was equilibrated with Tris-HCl buffer (50 mM pH 8.5), the crude L-asparaginase mixture was  
164 loaded into the column and washed with the same equilibration buffer. Elution was performed with a ramp of 0-  
165 100% 1 M NaCl in 50 ml. The presence of L-asparaginase was screened by measuring the catalytic activity.

## 167 **Asparaginase catalytic activity**

168 Asparaginase catalytic activity was assayed by measuring the release of ammonia determined by direct  
169 nesslerization [47]. The enzymatic reaction was started by dispensing the substrate solution (10 mM L-Asn, 100  
170 mM Tris-HCl pH 8.6) to the L-asparaginase samples up to 150 µl. All samples were assayed simultaneously in

171 a 96-well-plate, using an Infinite M200PRO plate-reader with automatic dispensers (Tecan Trading AG,  
172 Switzerland). The samples and substrate solution were pre-heated at 37°C. The reaction was stopped after 10  
173 min by dispensing 50  $\mu$ l of TCA (0.3 M). The presence of ammonia was measured by the increase in absorption  
174 at 425 nm after the addition of 50  $\mu$ l Nessler's reagent. Ammonia concentration was determined with a  
175 calibration curve made with ammonium sulfate. Measurements were performed in triplicate.

## 177 **Total protein quantification**

178 Total protein concentration was determined with Pierce™ BCA Protein Assay Kit used as per  
179 manufacturer's instructions and confirmed with the L-asparaginase absorption coefficient at 278 nm ( $E^{1\%} = 7.1$ )  
180 [48]. For samples that weren't pure enough, SDS-PAGE gel densitometry analysis was used to the correct  
181 concentration values using the >99% pure bands as standard. Densitometry analysis was performed with the Gel  
182 Analyzer II software (Copyright license 2010) with rolling ball background subtraction.

## 184 **Gel electrophoresis**

185 Native-PAGE and SDS-PAGE was performed using 4-20% polyacrylamide gels with the corresponding  
186 manufacturer's running and loading buffers (Bio-Rad, USA), run at 150 V for 1 h. Samples of 5  $\mu$ l were mixed  
187 at a 1:1 (v/v) ratio with the loading buffer and incubated for 5 min at 90°C in the case of denaturing SDS-  
188 PAGE. For Native-PAGE the samples were mixed with the native loading buffer and no further treatment was  
189 done. Gels were stained with 0.02% Coomassie Brilliant Blue G-250 and washed with de-staining solution (25  
190 ml ethanol, 40 ml acetic acid, up to 500 ml with distilled water).

## 192 **Mass spectroscopy**

193 Molecular weight of the native L-asparaginase and A38C-T263C mutant was obtained by mass  
194 spectroscopy. A MALDI 4800 plus TOF/TOF (SCIEX, USA) was used in positive linear mode, with sinapinic



195 acid (10 mg/ml), in acetonitrile and 0.1% trifluoro acetic acid (50:50 v/v) as matrix. Calibration was performed  
196 with Cal Mix 3 (5735-66431  $\pm$ 50 Da), then a commercial natural L-asparaginase II (*E. coli*) was set as standard  
197 (34600  $\pm$ 50 Da).

198 Identity of the native L-asparaginase was confirmed using MS/MS analysis [49]. Briefly, the excised L-  
199 asparaginase band from SDS-PAGE was digested overnight at 4°C with 50  $\mu$ l of trypsin (13 ng/ $\mu$ l) and the  
200 peptides purified using a reverse phase C-18 zip-tip column. Eluted peptides were plated on the MALDI target  
201 plate mixed 1:1 (v/v) with  $\alpha$ -cyano-4-hydroxycinnamic acid (5 mg/ml) in acetonitrile and 0.1% trifluoro acetic  
202 acid (50:50 v/v) as matrix, and then analyzed in positive reflector MS/MS mode. Calibration was performed  
203 with Glu-Fib-B1 (1571.61  $\pm$  0.5 Da). The precursor peptide pattern was compared against the *E. coli* taxonomy  
204 from the Mascot database online server.

## 206 **Site-specific PEGylation crosslinking**

207 The site-specific PEGylation crosslinking was carried out by reacting the terminal maleimide groups of  
208 the PEG polymers with the surface-exposed cysteines on L-asparaginase using the well-known thiol-Michael  
209 addition click chemistry [36]. Briefly, L-asparaginase (A38C-T263C) in the crosslinking buffer (0.1 M  
210 potassium phosphate, 5 mM EDTA, 0.150 M NaCl, pH 6.5-7.0) was reduced with 5 mM TCEP for 30 min at  
211 room temperature. Immediately after, the reduced solution was desalted and the concentration of readily-  
212 exposed Cys was calculated using 5,5'-dithiobis-2-nitrobenzoic acid (Ellman's reagent) [50]. The concentration  
213 of readily-exposed Cys was adjusted to 0.1 mM and reacted with the corresponding Bi-MAL-PEG polymer  
214 (1000, 2000 or 5000 g/mol) in a 40:1 molar ratio of PEG-to-Cys for 3 h at 25°C. Although a smaller molar ratio  
215 of PEG-to-Cys should promote greater likelihood of intramolecular crosslinking over intermolecular [51],  
216 preliminary experiments showed low recovery of neo-conjugates so we decided to keep a higher excess of PEG  
217 during the reaction. The reaction was stopped by addition of 10 mM DTT for 15 min, and the neo-conjugates  
218 were recovered by gel filtration chromatography or by repeated ultrafiltration steps in a 100 kDa cut-off filter.

219 Since L-asparaginase subunits have a mass of ~35 kDa, non-conjugated subunits should pass through this  
220 membrane while tetrameric (or higher) conjugates are retained.

221

## 222 **Computational analysis**

223 Geometry optimizations and electronic property computations of the model structure from L-  
224 asparaginase monomer were performed at the B3LYP/6-31G\* level of theory using the Gaussian 09 program  
225 [52-54]. The model structure comprises the amino acids forming the natural disulfide bond and the serine  
226 mutations (C77-105S), along with four adjacent residues (D76, D78, K104 and D106). The starting atomic  
227 coordinates were extracted from the crystal structure reported by Swain *et al.* (1993) [1]. Partial optimizations,  
228 in which last carbon atoms in adjacent residues are fixed, were carried out to explore the effect of substituting  
229 the S atoms of cysteine in the natural disulfide bond by OH groups thus generating the serine residues. The  
230 solvent effect of water was considered by using the polarizable continuum model (PCM)/X throughout the  
231 computations [55].

232

233

## 234 **Results and discussion**

235

### 236 **Characterization of site-specific PEGylation crosslinking**

237 Site-specific PEGylation was performed using thiol-maleimide chemistry [36], to target cysteine  
238 residues previously introduced by mutagenesis at positions A38 and T263. These positions were selected in  
239 order to minimize the distance between Cys-to-Cys on adjacent subunits and maximize it within the same  
240 subunit. We argue that this promotes a higher ratio of intramolecular (within the L-asparaginase tetramer) as  
241 opposed to intermolecular (tetramer-to-tetramer) crosslinking. Selection of the mutation sites was done using  
242 the reported crystal structure coordinates from Swain *et al.* (1993). The distance between cysteine residues on

243 adjacent subunits is 18-34 Å, while within the same subunit it is 55 Å. The selected cysteine mutations are far  
244 (~29 Å) from the active sites (**Fig 1A**) [1]. The tetrameric-structure of L-asparaginase has four active sites, each  
245 site is formed by the association of five residues from one subunit with two of the adjacent subunit (**Fig 1B**)  
246 [1,56]. It is difficult to select PEGylation positions further away from the active sites since L-asparaginase is a  
247 compact molecule. Nevertheless, the active site residues are relatively buried in comparison with the mutated  
248 cysteines (for PEGylation), the computed solvent accessible area of the catalytic center was 17.2 vs. 89.3 Å<sup>2</sup> of  
249 the mutated positions (A38C-T293C), which reduces the likelihood of the active sites being affected after site-  
250 specific PEGylation.

251  
252 **Fig 1. Selection of PEGylation sites on L-asparaginase.** (A) L-Asparaginase tetramer with subunits  
253 highlighted with different colors, one active site is represented in red spheres, the pre-selected PEGylation  
254 positions in blue spheres, and the distances between mutated residues (A38C and T632C) are shown by black  
255 dotted lines. (B) L-Asparaginase dimer showing two active sites relatively buried (red spheres) in comparison  
256 with the PEGylations sites (blue spheres).

257  
258 Site-specific PEGylation crosslinking was performed with homogeneous Bi-MAL-PEG polymers of  
259 1000, 2000 and 5000 g/mol, which resulted in three physically different conjugates. Increasing the polymer size  
260 caused the neo-conjugate rigidity to decrease until it became completely soluble. The 1kDa-PEG-conjugate was  
261 a semi-solid gel (**Fig 2A**), while the 2kDa-PEG-conjugate was physically a soft gel in which a fraction of L-  
262 asparaginase (catalytic activity) remained in solution. The 5kDa-PEG-conjugate was a fully soluble construct.  
263 We think these results can be explained by the degree of dynamic freedom of the PEG molecule and kinetics of  
264 the thiol-maleimide reaction. The mutated cysteines on the L-asparaginase surface are the nucleophiles  
265 responsible for attacking the electrophilic carbon of the maleimide ring [36]. The first step of the crosslinking  
266 reaction proceeds fast in the presence of a Bi-MAL-PEG molar excess and at low protein concentration [51].  
267 Once a cysteine reacts with one reactive side of the homo-bifunctional linker, the rate of the second reaction

268 step depends on how fast the Bi-MAL-PEG finds the second Cys partner. For the small PEG polymer to react  
269 with the intramolecular partner is less probable than to react with an intermolecular thiol partner therefore the  
270 rate of intermolecular crosslinking is superior. The result is a hydrogel of intermolecularly crosslinked L-  
271 asparaginase. The hydrophilicity of PEGs also influences the rate of this second step [57], since interaction with  
272 water delays the finding of a second intramolecular partner. At increasing Bi-MAL-PEG length the neo-  
273 conjugates became more soluble because of the promotion of intramolecular over intermolecular crosslinking  
274 due to an increased dynamic freedom of PEG. Subunit crosslinking of L-asparaginase has been reported by  
275 Balcão *et al.* (2001), although no direct evidence of this crosslinking was shown [58]. Handschumacher and  
276 Gaumont (1972) also reported on L-asparaginase crosslinking that resulted mainly in dimers [59]. Our site-  
277 specific PEGylation strategy yielded a highly homogeneous and covalently crosslinked 2kDa-PEG-conjugate,  
278 which ran equal to the native L-asparaginase tetramer on a Native-PAGE (**Fig 2B**) and did not dissociate during  
279 denaturing SDS-PAGE electrophoresis (**Fig 2C**) proving that the subunits were indeed covalently crosslinked.

280

281 **Fig 2. Site-specific PEGylation crosslinking with 1 and 2 kDa PEG.** (A) 1kDa-PEG-conjugate gel. (B)  
282 Native and (C) SDS-PAGE of native L-asparaginase (left lanes) and the 2kDa-PEG-conjugate (right lanes).  
283 Note that a substantial amount of the 2kDa-PEG-conjugate did not enter the gel because it was too large.

284

285 Site-specific PEGylation with the 5000 g/mol PEG was characterized by size exclusion chromatography  
286 to qualitatively follow the covalent crosslinking of the subunits. The mutant L-asparaginase (A38C-T263C) was  
287 reduced with TCEP prior to and after PEGylation and then analyzed using gel filtration chromatography. Due to  
288 the quite low purity of the starting mutant solution, eluted fractions were also evaluated for catalytic activity to  
289 corroborate the presence L-asparaginase. Prior to PEGylation, it was observed that the mutant (A38C-T263C)  
290 eluted at several fractions in which more than 50% of the catalytic activity was found from 8-13 ml, while after  
291 PEGylation most of the activity was found at one fraction which eluted at 8-9 ml (**Fig 3**). The elution peak of  
292 the 5kDa-PEG-conjugated is approximately related to a relative molecular weight of 600-900 kDa, double of

293 that reported for L-asparaginase randomly PEGylated using the lysine-directed approach [16,18]. One has to  
294 keep in mind that this result is not entirely accurate due to the high hydrophilicity of PEG that reduces protein  
295 mobility on gel filtration columns [57]. Despite of this, the calculated molecular weight was significantly higher  
296 than the 138.4 kDa of the native L-asparaginase tetramer. This implies that the 5kDa-PEG-conjugate likely also  
297 involves intra-intermolecular crosslinking. In any case, this neo-conjugate clearly exceeds the threshold of  
298 glomerular filtration which is beneficial for its application in leukemia [10,60], similar to the existing  
299 commercial randomly-PEGylated L-asparaginase [3-6,13]. The contrast between the catalytic activity eluted  
300 from gel filtration prior (wide distribution along 5 ml) and after (almost at a single 1 ml) PEGylation suggests  
301 that the 5kDa-PEG-conjugate must be indeed covalently crosslinked as it was not affected by reduction with  
302 TCEP contrary to the precursor mutant.

303  
304 **Fig 3. Site-specific PEGylation followed by size exclusion chromatography.** (A) Mutant L-asparaginase  
305 (A38C-T263C) reduced with TCEP and eluted from the gel filtration column. Fractions 8-13 ml were pooled  
306 and used for the site-specific PEGylation reaction. (B) 5kDa-PEG-Conjugate after crosslinking reaction,  
307 reduced with TCEP and eluted from the gel filtration column. The continuous curve represents relative  
308 absorbance at 280 nm, the bars are the relative asparaginase catalytic activity of the collected fractions.

309  
310 The product recovery after the site-specific crosslinking reaction by gel filtration was modest. The  
311 fraction where most of the 5kDa-PEG-conjugate eluted represents less than 20% of the initial catalytic activity  
312 exhibited by the starting mutant enzyme solution. For that reason, we also tested ultrafiltration for product  
313 purification using 10 and 100 kDa cut-off filters. The washing of the starting mutant enzyme solution after  
314 reduction with TCEP was done in a 10 kDa cut-off filter, immediately followed by the crosslinking reaction.  
315 The 5kDa-PEG-conjugate was pooled by performing repeated washing/concentration steps with a 100 kDa cut-  
316 off filter, since the non-conjugated L-asparaginase should flow-through these pores. The recovery by this

317 method was about 48% of the initial catalytic activity (**S1 Table**). This method is simpler and more efficient  
318 than the gel filtration approach (**S2 Fig**).

319 Our results are in stark contrast with those reported for the established random Lys-directed PEGylation  
320 of the enzyme where multiple molecular weight conjugates of L-asparaginase are obtained thus complicating  
321 subsequent separation processes required for the commercialization of this drug. Such disadvantage of random  
322 PEGylation is exemplified in the report by Soares *et al.* (2002), where a wide distribution of molecular weight  
323 conjugates could be observed by SDS-PAGE electrophoresis [18]. In addition to the present article, the work by  
324 Balan *et al.* (2007) also highlights the specificity of Cys-directed PEGylation, although in this case the  
325 conjugation was performed at the natural disulfide bond [34].

## 327 **Effect of site-specific PEGylation crosslinking on catalytic activity**

328 The antileukemia mechanism of L-asparaginase is still not fully understood, but there is a strong  
329 agreement that this enzyme acts by nutritional deprivation. Depletion of L-asparagine is perceived as the main  
330 trigger to destabilize the malignant cells, which are by themselves incapable of efficiently synthesizing this  
331 amino acid endogenously and therefore depend on the circulating L-Asn in blood. After administration of L-  
332 asparaginase, the enzyme reduces asparagine concentration in blood which impairs protein biosynthesis in the  
333 leukemia blasts and subsequently induces apoptosis in the cells that could not develop resistance [2-6].  
334 Therefore, retention of the L-asparaginase catalytic activity after any modification is the most important *in vitro*  
335 parameter to extrapolate its potential antileukemia effect *in vivo*. PEGylation is the most utilized conjugation  
336 method to enhance pharmacokinetics of protein-based drugs [10], and among many examples, a commercial  
337 PEGylated L-asparaginase from *E. coli* is being used as frontline treatment [2,5]. However, PEGylation is also  
338 known for promoting restriction of protein structural dynamics thus diminishing the catalytic activity at an  
339 increasing degree of modification [14,15].

340 Because of its therapeutic importance L-asparaginase has been modified using several types of  
341 materials, e.g., bound to inorganic matrices, conjugated with natural and synthetic polymers, encapsulated into

nanoparticles, and some hybrid-type approaches. A wide variety of results have been reported related to the pharmacodynamics parameters of those modifications, but in terms of PEGylation there is a clear conclusion that L-asparaginase catalytic activity is affected when conjugated using a Lys-directed approach depending on the degree of modification [61]. Wang *et al.* (2012) demonstrated that Lys-directed PEGylation can be improved through an alkylation strategy, the PEGylated L-asparaginase was highly homogeneous but still the catalytic activity was reduced to 44% compared to the non-modified enzyme [19]. Alkylation allows to control the degree of modification tightly, but PEGylation sites could not be selected which might explain the drastic reduction in catalytic activity even with a low degree of modification. Balan *et al.* (2007) successfully modified L-asparaginase at a single site using a three-carbon bridge strategy. The PEG neo-conjugate retained full catalytic activity independently of the PEG molecular weight. Unfortunately, this strategy is limited by the relative solvent accessible area of the natural disulfide bonds in the protein. The PEGylation sites cannot be selected which limits the potential to hide proteolytic and antigenic epitopes [34]. Another important aspect is that L-asparaginase is a tetrameric enzyme and the association of the monomeric subunits is imperative to form the active sites and exhibit catalytic activity [1,56]. It has been shown that PEGylation reduces the ability of this enzyme to form its tetrameric-structure [18], which could reduce the efficiency of this drug since the average administration is around 7 µg of L-asparaginase per milliliter of blood [5,62]. A covalent crosslinking strategy of L-asparaginase subunits has been proposed to stabilize the active multimeric structure, but previous results showed that this approach is linked to a cost in catalytic activity due to the Lys-directed conjugation employed. Balcão *et al.* (2001) retained 35% activity [58], while Handschumacher and Gaumond (1972) only managed to keep 17% compared to the non-modified L-asparaginase [59].

In this work we performed site-specific PEGylation of L-asparaginase subunits that yielded a fully soluble neo-conjugate after crosslinking with 5000 g/mol Bi-MAL-PEG. The average catalytic activity of the 5kDa-PEG-conjugate and its non-conjugated mutant precursor (A38C-T263C) was assayed *in vitro* by measuring the rate of L-Asn hydrolysis. L-asparaginase concentration was selected to be 14 µg/ml to simulate a therapeutically relevant concentration. The precursor mutant exhibited lower catalytic activity than the native

367 non-modified L-asparaginase ( $P < 0.05$ ),  $116 \pm 6$  vs.  $161 \pm 9$  U/mg, respectively (**Table 1**). This was unexpected  
368 since the mutated cysteines are relatively far away from the active site (**Fig 1**), which suggest that the high  
369 solvent accessible area of the mutated residues ( $89.3 \text{ \AA}^2$ ) might promote disulfide subunit multimerization that  
370 eventually affects formation of the L-asparaginase tetrameric-structure required to perform catalysis  
371 [18,34,63,64]. After site-specific crosslinking, the 5kDa-PEG-conjugate showed superior catalytic activity than  
372 the native L-asparaginase ( $P < 0.05$ ),  $210 \pm 11$  vs.  $161 \pm 9$  U/mg, respectively (**Table 1**). It was expected that this  
373 mutant should retain the same catalytic activity after site-specific PEGylation [34], but not that it would exceed  
374 the activity of native L-asparaginase. Since no mutations were performed near the active sites, these results  
375 support the hypothesis that the tetrameric-structure formation of L-asparaginase is a determinant step for its  
376 catalysis [18,34,63,64]. We presume that the covalent crosslinking maintains the subunits within high proximity  
377 between each other, hereby facilitating the formation of the active tetrameric-structure triggered by the presence  
378 of the L-Asn substrate [63,64], a process that usually is rate limiting. To support these observations we  
379 compared the catalytic activity of the 5kDa-PEG-conjugate and native non-modified enzyme at below  
380 biological temperature, to introduce an energetic effect that should delay the association of the tetrameric-  
381 structure thus reducing the average catalytic activity as well [17,40,64]. At  $24^\circ\text{C}$  the native L-asparaginase  
382 exhibited a catalysis of  $47.2 \pm 1.7$  U/mg that is 30% of the one observed at  $37^\circ\text{C}$ . The activity obtained for the  
383 5kDa-PEG-conjugate was  $210 \pm 6$  U/mg, basically the same as observed at  $37^\circ\text{C}$ . This strongly suggest that the  
384 covalent intrasubunit crosslinking is playing a stabilizing effect that accelerates the formation of the active  
385 structure upon addition of the L-Asn substrate [63]. It is important to explain that due to the low purity of the  
386 starting mutant solution (A38C-T263C), the 5kDa-PEG-conjugate solution is not pure as well (**S2 Fig**). This  
387 means that the L-asparaginase concentration value used is overestimated, which causes the value of the  
388 calculated specific activity to be underestimated (**S3 and S4 Tables**).

389

390 **Table 1. Catalytic activity of site-specific crosslinked L-asparaginase.**



| Sample                          | Specific activity (U/mg) | Relative activity (%) <sup>a</sup> |
|---------------------------------|--------------------------|------------------------------------|
| Native                          | 161 ± 9                  | <b>100</b>                         |
| A38C-T263C                      | 116 ± 6                  | <b>72 ± 6</b>                      |
| 5kDa-PEG-conjugate              | 210 ± 11                 | <b>130 ± 11</b>                    |
| Randomly-PEGylated <sup>b</sup> | 125 ± 10                 | <b>77 ± 8</b>                      |

<sup>a</sup>Specific activity of native L-asparaginase was defined as 100%.

<sup>b</sup>Commercial randomly-PEGylated L-asparaginase formulation (Millipore Sigma, USA) was used for comparison.

Reported values are the average with the standard deviation calculated by error propagation.

In summary, a new site-specific PEGylation strategy to crosslink L-asparaginase subunits generated higher molecular weight neo-conjugates and improved the average catalytic activity likely involving an intrasubunit proximity-stabilization mechanism. Compared to previous reported PEGylation strategies, our PEGylation method is the only one that improved the catalytic potential of L-asparaginase (**Table 2**). A similar method has not been proposed before possibly due to the difficulty to express and purify recombinant L-asparaginase containing non-natural cysteines [42]. We are the first to report this kind of mutation in L-asparaginase designed for site-specific conjugation, which is beneficial to improve this therapeutic enzyme since a commercial recombinant L-asparaginase is already on the market [2].

**Table 2. Comparison of PEGylation methods for L-asparaginase.**

| Modification specificity <sup>a</sup>      | Modification degree (%) <sup>b</sup> | Activity (%) <sup>c</sup> | Reference                     |
|--------------------------------------------|--------------------------------------|---------------------------|-------------------------------|
| PEG dichloro-s-triazine (5000 Da)          | 20-79                                | 45-11                     | Ashihara <i>et al.</i> [16]   |
| 1900 Da                                    | 76                                   | 20                        |                               |
| 750 Da                                     | 84                                   | 16                        |                               |
| PEG vinylpyrrolidone-maleic acid (5000 Da) | 33                                   | 59                        | Qian <i>et al.</i> [17]       |
| PEG succinimidyl succinate (5000 Da)       | 54                                   | 30                        | Soares <i>et al.</i> [18]     |
| PEG propionaldehyde (20000 Da)             | 4                                    | 44                        | Wang <i>et al.</i> [19]       |
| PEG chloro-s-triazine (10000 Da)           | 57                                   | 11                        | Matsushima <i>et al.</i> [20] |
| PEG chloro-s-triazine (10000 Da)           | 57                                   | 8                         | Kamisaki <i>et al.</i> [21]   |
| PEG comb-shaped (100000 Da)                | 34                                   | 86                        | Kodera <i>et al.</i> [22]     |

|                                          |    |     |                               |
|------------------------------------------|----|-----|-------------------------------|
| 13000 Da                                 | 50 | 46  |                               |
| PEG monosulfone (5000, 10000 & 20000 Da) | 1  | 100 | Balan <i>et al.</i> [34]      |
| Dextran-glutaraldehyde                   | 99 | 35  | Balcão <i>et al.</i> [58]     |
| Dimethylsuberimidate                     | 25 | 17  | Handschumacher & Gaumond [59] |
| PEG Bi-maleimide (5000 Da)               | 2  | 130 | This work                     |

<sup>a</sup>Modification specificity refers to the functional group in the polymer that conjugates to L-asparaginase.

<sup>b</sup>Modification degree refers to the percentage of sites conjugated from the total Lys available on L-asparaginase.

<sup>c</sup>Activity refers to the relative catalytic activity of neo-conjugate compared to the non-conjugated L-asparaginase.

Studies on PEGylation of L-asparaginase show a fine trend of decreasing catalytic activity with increasing degree of modification (**Fig 4**), which can be explained by the restriction of protein structural dynamics related to the number of polymers conjugated to the protein, but independently of the PEG molecular weight [14,15]. Our results do not deviate from this trend, but we rather report a flexible strategy that allows to vary the conjugation site to target potential proteolytic and immunogenic epitopes. Simultaneously, the covalent subunits crosslinking increases the molecular weight to delay glomerular filtration [10,60].

**Fig 4. Trend on catalytic activity with degree of PEGylation.** Reported catalytic activity of PEGylated L-asparaginase with degree of conjugation. Relative activity is expressed as percentage compared to the non-conjugated L-asparaginase. Modification degree refers to the percentage relative to the available lysines. The results to generate this figure were extracted from references [16-22,34] and this work.

L-Asparaginase is also being studied as a possible solution to reduce the formation of acrylamide in fried food products [7]. Even though it is not the main scope of this report, the physical properties of our 1kDa-PEG-conjugate could be beneficial for industrial applications that use L-asparaginase. After treating raw products with L-asparaginase to hydrolyze the acrylamide precursor asparagine, the enzyme is difficult to recover due to its soluble state. Our neo-conjugate is a semi-solid gel that can be recovered from solution and reutilized. We tested the catalytic activity of this neo-conjugate within a temperature range from 20°C to 80°C to evaluate its potential for being used in industrial applications. The same 1kDa-PEG-conjugate sample was used

428 throughout the whole experiment by washing the gel with distilled water after each catalytic cycle. Our neo-  
429 conjugate proved to be highly reusable along the 27 cycles tested, with a maximum catalytic temperature up to  
430 60°C (**Fig 5**). Although L-asparaginase is a multimeric protein with the catalytic core in the middle of two  
431 subunits [1,56], our discreet conjugation didn't affect its enzymatic function even in an insoluble state. This  
432 conjugation strategy could be extended to other industrially important enzymes to improve cost-efficiency.

433  
434 **Fig 5. Reusability of the 1kDa-PEG-conjugate.** Relative catalytic activity at temperatures ranging from 20°C  
435 to 80°C. The 1kDa-PEG-conjugate (in green), native L-asparaginase (in blue), and a commercial randomly-  
436 PEGylated L-asparaginase formulation (Millipore Sigma, USA) (in black). Relative catalytic activity was  
437 calculated by the absorption at 425 nm divided by the maximum signal for each sample and expressed as  
438 percentile (%). Reported values are average with error bars representing the 95% confidence interval. For the  
439 1kDa-PEG-conjugate the same sample (semi-solid gel) was used throughout all the experiment.

## 441 **Secretory expression**

442 In this work, a recombinant L-asparaginase was expressed using the commercial pET system (Novagen,  
443 Germany). Induction of the pET22b-AspII expression system with IPTG concentrations of 500 and 1000  $\mu$ M  
444 was counterproductive, since it significantly decreased the secretion of native L-asparaginase in comparison  
445 with induction using 10 and 100  $\mu$ M ( $P < 0.01$ ) (**S5 Fig**). These results agree with other studies using the same  
446 pET system. Khushoo *et al.* (2004) found that a concentration of 100  $\mu$ M of IPTG was favorable for secretion  
447 and cell growth [37], while Vidya *et al.* (2011) reported the highest level of secretion inducing with 10  $\mu$ M of  
448 IPTG [39]. Extracellular secretion of L-asparaginase to the growth medium was monitored at 8, 16 and 24 h  
449 post-induction. Most of the catalytic activity was found in the culture medium at 8 h post-induction, afterwards  
450 the ratio of activity-to-biomass decreased (**S5 Fig**). It is unnecessary to grow cultures beyond 8 h, which is a  
451 practical information when producing high amount of this enzyme recombinantly. Due to the convenience of  
452 producing L-asparaginase as secretory product to avoid formation of inclusion bodies [37-41], we tested the

453 ratio of extracytoplasmic secretion to the periplasmic space and culture medium for three recombinant  
454 constructs: the native L-asparaginase, the double mutant A38C-T263C, and a C77-105S mutant that lacks the  
455 natural disulfide bridge. The presence of catalytic activity was measured in the clear culture medium after  
456 biomass centrifugation and in the periplasmic space fraction obtained by osmotic shock. It was found that for  
457 each independent construct the secretion ratio did not vary significantly, a similar amount of catalytic activity  
458 was found in both the culture medium and periplasmic fraction. On the contrary, the absolute productivity (U/g)  
459 varied between the three constructs. The native construct exhibited ~4.1-fold secretory expression compared to  
460 the A38C-T263C mutant, while the C77-105S mutant showed almost no expression (**Table 3**).

461

462 **Table 3. Extracytoplasmic secretion of recombinant L-asparaginase constructs.**

| Sample                | Culture medium     |                        | Periplasmic space  |                        |
|-----------------------|--------------------|------------------------|--------------------|------------------------|
|                       | Productivity (U/g) | Ratio (%) <sup>b</sup> | Productivity (U/g) | Ratio (%) <sup>b</sup> |
| Native                | 1273 ± 74          | 40.3 ± 6.4             | 1883 ± 152         | 59.7 ± 6.3             |
| A38C-T263C            | 324 ± 35           | 42.9 ± 9.8             | 431 ± 20           | 57.1 ± 5.3             |
| C77-105S <sup>a</sup> | 31 ± 7             |                        | 13 ± 2             |                        |

463 <sup>a</sup>The C77-105S mutant exhibited insignificant signal and thus the secretion ratio was not calculated.

464 <sup>b</sup>Secretion ratio was calculated as percentage of total extracytoplasmic secretion.

465 Reported values are the average with standard deviation.

466

467 The results from secretory expression suggest that the presence of cysteine residues in L-asparaginase is  
468 a factor inhibiting secretion of the enzyme, despite of the constructs all having the natural signaling peptide  
469 [43]. The almost-full inhibition of extracytoplasmic secretion (~70 times less than the native) by the C77-105S  
470 mutation may be related to the mechanism used by *E. coli* to translocate the recombinant protein through the  
471 cytoplasmic membrane. Introduction of additional cysteines (A38C-T263C mutant) while still maintaining the  
472 natural disulfide bridge (between C77 and C105) affected secretion to a lesser degree, which may be just an  
473 inherent consequence of a lower Cys-tRNA abundance in the expression organism [42]. The question that now  
474 arises is whether the position of the natural cysteines plays any important role in L-asparaginase secretion, or if  
475 solely the presence is sufficient. This is the first study that reports removal or introduction of cysteine residues  
476 in L-asparaginase and its effect on extracytoplasmic expression.

477

## 478 **Effect of natural disulfide bond mutation on catalytic activity**

479 The specific catalytic activity of the recombinant L-asparaginase C77-105S mutant was determined to  
480 evaluate the feasibility of using this mutant in future studies. It is possible to conjugate the natural cysteines in  
481 L-asparaginase (C77 and C105) as reported by Balan *et al.* (2007) [34], so these residues could interfere with  
482 the thiol-maleimide reaction targeted at canonical cysteines introduced by mutagenesis. For this reason, it is  
483 beneficial to understand the importance of this natural disulfide bridge on the catalytic activity of L-  
484 asparaginase. This C77-C105 bond is relatively away from the active site (~35 Å) [1], and does not significantly  
485 impact the catalytic activity after been reduced [65]. The solvent accessible area decreases upon formation of  
486 the tetrameric-structure suggesting that hydrophobic interactions on the internal subunits interface stabilize the  
487 quaternary structure [64], while binding of the L-Asn substrate promotes additional structural stabilization [63].  
488 Therefore, elimination of the natural disulfide bond should not significantly affect the catalytic activity. We  
489 replaced the cysteine amino acids (C77 and C105) by two serine residues with the intention of minimizing any  
490 alteration of the surrounding environment of these residues. We found no significant difference in the specific  
491 activity exhibited by the native L-asparaginase and C77-105S mutant (**Table 4**). This implies that removal of  
492 the natural disulfide bond should not destabilize the tetrameric-structure of L-asparaginase.

493

494 **Table 4. Catalytic activity of L-asparaginase C77-105S mutant.**

| Sample   | Specific activity (U/mg) | Relative activity (%) <sup>a</sup> |
|----------|--------------------------|------------------------------------|
| Natural  | 177 ± 11                 | <b>100</b>                         |
| Native   | 156 ± 14                 | <b>88 ± 10</b>                     |
| C77-105S | 160 ± 9                  | <b>91 ± 7</b>                      |

495 <sup>a</sup>Specific activity of commercial natural L-asparaginase II (Millipore Sigma, USA) was defined as 100%.  
496 Reported values are the average with the standard deviation calculated by error propagation.

497

498 Computational analysis was used to evaluate possible structural disturbances caused by the C77-105S  
499 mutation in the vicinity of the natural disulfide bridge. The original structure from Swain *et al.* (1993) was used

500 as starting coordinates for the natural cysteines (C77 and C105) along with four residues (D76, D78, K104, and  
501 D106) contained in the model [1]. After this model was geometrically optimized, the sulfur atoms in the  
502 cysteines were replaced by hydroxyl groups to generate the serine residues, and the resulting structure was  
503 optimized. Interestingly, the C77-105S mutation does not cause significant structural disturbance, as revealed  
504 by the superposition of the two optimized structures (**Fig 6**). It is highly possible that one hydrogen bond (1.828  
505 Å O···HO) is formed between the serine residues. More details are presented in the supporting information (**S6**  
506 **Fig and S7 Table**). These calculations agree with the catalytic activity observed for the C77-105S mutant,  
507 showing that no structural disturbance takes place hence the active site should not be affected. These findings  
508 support the hypothesis that formation of the tetrameric-structure of L-asparaginase should be driven by other  
509 forces such as hydrophobic interactions and substrate binding [18,63,64].

510  
511 **Fig 6. Computational analysis of the C77-105S mutation.** (A) Superposition of geometrically optimized  
512 structures of the natural disulfide bond and C77-105S mutation. (B) Formation of a new hydrogen bond in the  
513 C77-105S mutant.

## 515 Purification

516 The purification of recombinant L-asparaginase constructs was performed by a single step of anion exchange  
517 chromatography [45,46], using a high resolution MonoQ 8-ml column. The pellet from a 200 ml-culture sample  
518 was subjected to osmotic shock, and the clear crude mixture was purified on the MonoQ column. The native L-  
519 asparaginase was successfully purified with >95% purity (by SDS-PAGE) along three 1 ml-fractions (**S8 Fig**).  
520 The final overall yield for this construct was 29 mg of pure L-asparaginase per liter of culture, which is an  
521 excellent although not as good as in previous reports using affinity purification methods [37,38,40].  
522 Unfortunately, a His-tag affinity purification has been reported to interfere with the catalytic activity of L-  
523 asparaginase [38] and for this reason we designed our expression system with the intention of producing a  
524 native L-asparaginase without any modification. The mutant A38C-T263C was also purified with a good

525 recovery although the purity was inferior (65% by SDS-PAGE) compared to native L-asparaginase (**S9 Fig**).  
526 This was unexpected since both constructs have the same calculated isoelectric point (pI 5.8). At this point, it  
527 can only be assumed that the non-natural cysteines in the mutant may interfere in some way with the column  
528 binding. By last, the mutant C77-105S was purified with a very low yield, although this was expected because  
529 of the poor secretory expression observed (**Table 3**), the purity was also inferior compared to the other  
530 constructs (35% by SDS-PAGE) (**S9 Fig**).

531 The relative molecular weight of the recombinant L-asparaginase constructs was calculated by mass  
532 spectroscopy. The main  $m/z$  peak was observed at 34605 g/mol for the native L-asparaginase, while 34634  
533 g/mol for the mutant A38C-T263C (**Fig 7**). Unfortunately, it was not possible to obtain detailed information for  
534 the mutant C77-105S due to the limited amount of sample and the level of impurities. These results agree with  
535 the molecular weight calculated theoretically for the native L-asparaginase and mutant A38C-T263C, i.e., 34.60  
536 and 34.63 kDa respectively. Both constructs were purified in its mature form since the pre-L-asparaginase  
537 should have a subunit mass around 36.8 kDa [43], we concluded that the natural signaling peptide was properly  
538 excised.

539  
540 **Fig 7. Subunit mass of recombinant native L-asparaginase and mutant A38C-T263C.** The  $m/z$  peak for the  
541 native L-asparaginase subunit (in green) was observed at 34605 g/mol, while the  $m/z$  peak for the mutant A38C-  
542 T263C subunit (in black) was observed at 34634 g/mol.

543  
544 MS/MS analysis was performed to the recombinant native L-asparaginase to confirm its identity. The  
545 peptides  $m/z$  pattern matched the theoretical trypsin-digested precursors pattern of *E. coli* L-asparaginase II  
546 from the Mascot database with a protein-score of 118 and 46% sequence coverage (**S10 Fig**). In the Mascot  
547 database, protein-scores are calculated as  $-10 \cdot \log(R)$ , with R being the probability that the observed pattern is a  
548 random match. A score greater than 74 are considered significant ( $P < 0.05$ ).

550

## 551 **Conclusions**

552       Herein we report an alternative site-specific conjugation strategy to modify the therapeutic enzyme L-  
553 asparaginase. Our strategy is based on three main pillars: firstly, that the molecular weight of L-asparaginase  
554 can be increased by crosslinking the subunits without the need to modify this protein excessively; secondly, that  
555 the polymers can be linked to the enzyme at pre-selected non-natural residues along the surface, to hide  
556 potential proteolytic and immunogenic epitopes; and thirdly, that intramolecular crosslinking of the subunits  
557 stabilizes the active tetrameric-structure to enhance catalytic activity. We demonstrated that site-specific  
558 PEGylation can be used to conjugate L-asparaginase at two different positions on its surface, while at the same  
559 time maintaining its full enzymatic potential. We found that introduction or removal of cysteine residues seems  
560 important for the proper extracellular expression of L-asparaginase in *E. coli* and achieved to purify this  
561 recombinant protein using a single anion exchange step.

562       Our 5kDa-PEG-conjugate was fully soluble with a molecular weight about double of randomly-  
563 PEGylated formulations, which is beneficial to delay glomerular filtration during the *in vivo* therapeutic  
564 application of this enzyme. Even more important, this neo-conjugate retained full catalytic activity, and we  
565 proposed that this is possible due to a tetrameric-structure stabilization effect that accelerates the formation of  
566 the active quaternary structure of L-asparaginase. In addition, the 1kDa-PEG-conjugate was a highly reusable  
567 semi-solid gel that exhibited catalytic activity and can be used for applications in the food industry. The  
568 reported site-specific conjugation approach provides the possibility to modify L-asparaginase pharmacokinetics  
569 while maintaining its pharmacodynamics properties, which is beneficial for the application of this drug in  
570 biological conditions.

571

572

## 573 **Acknowledgments**



574 This work was developed with materials, instrumentation and facilities provided by Kai Griebenow's  
575 research laboratory at Facundo Bueso building at the University of Puerto Rico at Rio Piedras campus, the  
576 Molecular Sciences Research Center at the UPR, and RISE Program at UPR Rio Piedras NIH Grant No.  
577 5R25GM061151-16. We like to thank Arthur D. Tinoco for his help with the mass spectroscopy  
578 instrumentation.

## 581 **References**

- 582 1. Swain AL, Jaskólski M, Housset D, Mohana Rao JK, Wlodawer A. Crystal structure of *Escherichia coli* L-  
583 asparaginase, an enzyme used in cancer therapy. Proc Natl Acad Sci USA. 1993; 90(4): 1474-1478.
- 584 2. Lanvers-Kaminsky C. Asparaginase pharmacology: challenges still to be faced. Cancer Chemother  
585 Pharmacol. 2017; 79(3): 439-450.
- 586 3. van den Berg H. Asparaginase revisited. Leuk Lymphoma. 2011; 52(2): 168-178.
- 587 4. Avramis VI, Tiwari PN. Asparaginase (native ASNase or pegylated ASNase) in the treatment of acute  
588 lymphoblastic leukemia. Int J Nanomedicine. 2006; 1(3): 241-254.
- 589 5. Shrivastava A, Khan AA, Khurshid M, Kalam MA, Jain SK, Singhal PK. Recent developments in L-  
590 asparaginase discovery and its potential as anticancer agent. Crit Rev Oncol Hematol. 2016; 100: 1-10.
- 591 6. Narta UK, Kanwar SS, Azmi W. Pharmacological and clinical evaluation of L-asparaginase in the treatment  
592 of leukemia. Crit Rev Oncol Hematol. 2007; 61(3): 208-221.
- 593 7. Krishnapura PR, Belur PD, Subramanya S. A critical review on properties and applications of microbial L-  
594 asparaginases. Crit Rev Microbiol. 2016; 42(5): 720-737.
- 595 8. Patel N, Krishnan S, Offman MN, Krol M, Moss CX, Leighton C, et al. A dyad of lymphoblastic lysosomal  
596 cysteine proteases degrades the antileukemic drug L-asparaginase. J Clin Invest. 2009; 119(7): 1964-1973.
- 597 9. Liu C, Kawedia JD, Cheng C, Pei D, Fernandez CA, Cai X, et al. Clinical utility and implications of  
598 aspraginase antibodies in acute lymphoblastic leukemia. Leukemia 2012; 26(11): 2303-2309.

- 599 10. Mishra P, Nayak B, Dey RK. PEGylation in anti-cancer therapy: an overview. *Asian J Pharm Sci.* 2016;  
600 11(3): 337-348.
- 601 11. Veronese FM, Mero A. The impact of PEGylation on biological therapies. 2008; 22(5): 315-329.
- 602 12. Milla P, Dosio F, Cattel L. PEGylation of proteins and liposomes: a powerful and flexible strategy to  
603 improve the drug delivery. *Curr Drug Metab.* 2012; 13(1): 105-119.
- 604 13. Avramis VI, Sencer S, Periclou AP, Sather H, Bostrom BC, Cohen LJ, et al. A randomized comparison of  
605 native *Escherichia coli* asparaginase and polyethylene glycol conjugated asparaginase for treatment of  
606 children with newly diagnosed standard-risk acute lymphoblastic leukemia: a Children's Cancer Group  
607 study. *Blood.* 2002; 99(6): 1986-1994.
- 608 14. Rodríguez-Martínez JA, Solá RJ, Castillo B, Cintró-Colón HR, Rivera-Rivera I, Barletta G, et al.  
609 Stabilization of alpha-chymotrypsin upon PEGylation correlates with reduced structural dynamics.  
610 *Biotechnol Bioeng.* 2008; 101(6): 1142-1149.
- 611 15. Rodríguez-Martínez JA, Rivera-Rivera I, Solá RJ, Griebenow K. Enzymatic activity and thermal stability of  
612 PEG-alpha-chymotrypsin conjugates. *Biotechnol Lett.* 2009; 31(6): 883-887.
- 613 16. Ashihara Y, Kono T, Yamazaki S, Inada Y. Modification of *E. coli* L-asparaginase with polyethylene  
614 glycol: disappearance of binding ability to anti-asparaginase serum. *Biochem Biophys Res Commun.* 1978;  
615 83(2): 385-391.
- 616 17. Qian G, Ma J, Zhou J, He B, Wang D. Chemical modification of *E. coli* L-asparaginase with polyethylene  
617 glycol grafted vinylpyrrolidone-maleic anhydride copolymer. *Polym Adv Technol.* 1997; 8(10): 581-586.
- 618 18. Soares AL, Guimarães GM, Polakiewicz B, de Moreles Pitombo RN, Abrahão-Neto J. Effects of  
619 polyethylene glycol attachment on physicochemical and biological stability of *E. coli* L-asparaginase. *Int J*  
620 *Pharm.* 2002; 237(1-2): 163-170.
- 621 19. Wang B, Cao Y, Chi S, Lou D. A PEGylation technology of L-asparaginase with monomethoxy  
622 polyethylene glycol-propionaldehyde. *Z Naturforsch C.* 2012; 67(5-6): 312-318.
- 623 20. Matsushima A, Nishimura N, Ashihara Y, Yokota Y, Inada Y. L-Asparaginase modification with

- 624 monomethoxypolyethylene glycol. Chem Lett. 1980; 7: 773-776.
- 625 21. Kamisaki Y, Wada H, Yagura T, Matsushima A, Inada Y. Reduction in immunogenicity and clearance rate  
626 of *Escherichia coli* L-asparaginase by modification with monomethoxypolyethylene glycol. J Pharmacol  
627 Exp Ther. 1981; 216(2): 410-414.
- 628 22. Kodera Y, Sekine T, Yasukohchi T, Kiri Y, Hiroto M, Matsushima A, et al. Stabilization of L-asparaginase  
629 modified with comb-shaped poly(ethylene glycol) derivatives, *in vivo* and *in vitro*. Bioconjug Chem. 1994;  
630 5(4): 283-286.
- 631 23. Asselin BL, Lorenson MY, Whitin JC, Coppola DJ, Kende AS, Blakley RL, et al. Measurement of serum L-  
632 asparagine in the presence of L-asparaginase requires the presence of an L-asparaginase inhibitor. Cancer  
633 Res. 1991; 51(24): 6568-6573.
- 634 24. Armstrong JK, Hempel G, Koling S, Chan LS, Fisher T, Meiselman HJ, et al. Antibody against  
635 poly(ethylene glycol) adversely affects PEG-asparaginase therapy in acute lymphoblastic leukemia patients.  
636 Cancer. 2007; 110(1): 103-111.
- 637 25. Garay RP, El-Gewely R, Armstrong JK, Garratty G, Richette P. Antibodies against polyethylene glycol in  
638 healthy subjects and in patients treated with PEG-conjugated agents. Expert Opin Drug Deliv. 2012; 9(11):  
639 1319-1323.
- 640 26. Hashimoto Y, Shimizu T, Mima Y, Abu Lila AS, Ishida T, Kiwada H. Generation, characterization and *in*  
641 *vivo* biological activity of two distinct monoclonal anti-PEG IgMs. Toxicol Appl Pharmacol. 2014; 277(1):  
642 30-38.
- 643 27. Swierczewska M, Lee KC, Lee S. What is the future of PEGylated therapies? Expert Opin Emerg Drugs.  
644 2015; 20(4): 531-536.
- 645 28. Tallal L, Tan C, Oettgen H, Wollner N, McCarthy M, Helson L, et al. *E. coli* L-asparaginase in the  
646 treatment of leukemia and solid tumors in 131 children. Cancer. 1970; 25(2): 306-320.
- 647 29. Sutow WW, Garcia F, Starling KA, Williams TE, Lane DM, Gehan EA. L-asparaginase therapy in children  
648 with advanced leukemia. The Southwest Cancer Chemotherapy Study Group. Cancer. 1971; 28(4): 819-824.

- 649 30. Shaunak S, Godwin A, Choi JW, Balan S, Pedone E, Vijayarangam D, et al. Site-specific PEGylation of  
650 native disulfide bonds in therapeutic proteins. *Nat Chem Biol.* 2006; 2(6): 312-313.
- 651 31. Jevsevar S, Kunstelj M, Porekar VG. PEGylation of therapeutic proteins. *Biotechnol J.* 2010; 5(1): 113-128.
- 652 32. Zhang C, Yang XL, Yuan YH, Pu J, Liao F. Site-specific PEGylation of therapeutic proteins via  
653 optimization of both accessible reactive amino acid residues and PEG derivatives. *BioDrugs.* 2012; 26(4):  
654 209-215.
- 655 33. Dozier JK, Distefano MD. Site-specific pegylation of therapeutic proteins. *Int J Mol Sci.* 2015; 16(10):  
656 25831-25864.
- 657 34. Balan S, Choi JW, Godwin A, Teo I, Laborde CM, Heidelberger S, et al. Site-specific PEGylation of protein  
658 disulfide bonds using a three-carbon bridge. *Bioconjug Chem.* 2007; 18(1): 61-76.
- 659 35. Brocchini S, Godwin A, Balan S, Choi JW, Zloh M, Shaunak S. Disulfide bridge based PEGylation of  
660 proteins. *Adv Drug Deliv Rev.* 2008; 60(1): 3-12.
- 661 36. Nair DP, Podgórski M, Chatani S, Gong T, Xi W, Fenoli CR, et al. The thiol-Michael addition click  
662 reaction: a powerful and widely used tool in materials chemistry. *Chem Mater.* 2014; 26(1): 724-744.
- 663 37. Khushoo A, Pal Y, Singh BN, Mukherjee KJ. Extracellular expression and single step purification of  
664 recombinant *Escherichia coli* L-asparaginase II. *Protein Expr Purif.* 2004; 38(1): 29-36.
- 665 38. Khushoo A, Pal Y, Mukherjee KJ. Optimization of extracellular production of recombinant asparaginase in  
666 *Escherichia coli* in shake-flask and bioreactor. *Appl Microbiol Biotechnol.* 2005; 68(2): 189-197.
- 667 39. Vidya J, Vasudevan UM, Soccol CR, Pandey A. Cloning, functional expression and characterization of L-  
668 asparaginase II from *E. coli* MTCC 739. *Food Technol Biotechnol.* 2011; 49(3): 286-290.
- 669 40. Muharram MM, Abulhamd AT, Mounir M, Bekhet S. Recombinant expression, purification of L-  
670 asparaginase II from thermotolerant *E. coli* strain and evaluation of its antiproliferative activity. *African J*  
671 *Microbiol Res.* 2014; 8(15): 1610-1619.
- 672 41. Upadhyay AK, Singh A, Mukherjee KJ, Panda AK. Refolding and purification of recombinant L-  
673 asparaginase from inclusion bodies of *E. coli* into active tetrameric protein. *Front Microbiol.* 2014; 5(486):

- 674 1-10.
- 675 42. Mergulhão FJ, Summers DK, Monteiro GA. Recombinant protein secretion in *Escherichia coli*. Biotechnol  
676 Adv. 2005; 23(3): 177-202.
- 677 43. Jennings MP, Beacham IR. Analysis of the *Escherichia coli* gene encoding L-asparaginase-II, ansB, and its  
678 regulation by cyclic AMP receptor and FNR proteins. J Bacteriol. 1990; 172(3): 1491-1498.
- 679 44. Gibson DG, Young L, Chuang RY, Venter JC, Hutchison CA III, Smith HO. Enzymatic assembly of DNA  
680 molecules up to several hundred kilobases. Nat Methods. 2009; 6: 343-345.
- 681 45. Roberts J, Burson G, Hill JM. New procedures for purification of L-asparaginase with high yield from  
682 *Escherichia coli*. J Bacteriol. 1968; 95(6): 2117-2123.
- 683 46. Ho PP, Frank BH, Burck PJ. Crystalline L-asparaginase from *Escherichia coli* B. Science. 1969; 165(3892):  
684 510-512.
- 685 47. Wriston JC Jr. Asparaginase. Methods in Enzymology. 1985; 113: 608-618.
- 686 48. Ho PP, Milikin EB, Bobbitt JL, Grinnan EL, Burck PJ, Frank BH, et al. Crystalline L-asparaginase from  
687 *Escherichia coli* B. I. Purification and chemical characterization. J Biol Chem. 1970; 245(14): 3708-3715.
- 688 49. Kussman M, Nordhoff E, Rahbek-Nielsen H, Haebel S, Rossel-Larsen M, Jakobsen L, et al. Matrix-assisted  
689 laser desorption/ionization mass spectroscopy sample preparation techniques designed for various peptide  
690 and protein analytes. J Mass Spectrom. 1997; 32: 593-601.
- 691 50. Riddles PW, Blakeley RL, Zerner B. Ellman's reagent: 5,5'-dithiobis(2-nitrobenzoic acid) a reexamination.  
692 Anal Biochem. 1979; 94(1): 75-81.
- 693 51. Cheung DT, Nimni ME. Mechanism of crosslinking of proteins by glutaraldehyde I: reaction with model  
694 compounds. Connect Tissue Res. 1982; 10(2): 187-199.
- 695 52. Becke AD. Density-functional thermochemistry. III. The role of exact exchange. J Chem Phys. 1993; 98:  
696 5648-5652.
- 697 53. Lee C, Yang W, Parr RG. Development of the Colic-Salvetti correlation-energy into a functional of the  
698 electron density formula into a functional of the electron density. Phys Rev B Condens Matter. 1988; 37(2):

- 699 785-789.
- 700 54. Ortiz JV, Cioslowski J, Fox DJ. Gaussian 09, revision B. 01. Wallingford CT, 2009.
- 701 55. Vreven T, Mennucci B, Da Silva CO, Morokuma K, Tomasi J. The ONIOM-PCM method: Combining the  
702 hybrid molecular orbital method and the polarizable continuum model for solvation. Application to the  
703 geometry and properties of a merocyanine in solution. *J Chem Phys.* 2001; 115: 62-72.
- 704 56. Gesto DS, Cerqueira NMFSA, Fernandes PA, Ramos MJ. Unraveling the enigmatic mechanism of L-  
705 asparaginase II with QM/QM calculations. *J Am Chem Soc.* 2013; 135(19): 7146-7158.
- 706 57. Jackson CJC, Charlton JL, Kuzminski K, Lang GM, Sehon AH. Synthesis, isolation, and characterization of  
707 conjugates of ovalbumin with monomethoxypolyethylene glycol using cyanuric chloride as the coupling  
708 agent. *Anal Biochem.* 1987; 165(1): 114-127.
- 709 58. Balcão VM, Mateo C, Fernández-Lafuente R, Malcata FX, Guisán JM. Structural and functional  
710 stabilization of L-asparaginase via multisubunit immobilization onto highly activated supports. *Biotechnol*  
711 *Prog.* 2001; 17(3): 537-542.
- 712 59. Handschumacher RE, Gaumont C. Modification of L-asparaginase by subunit cross-linking with  
713 dimethylsuberimidate. *Mol Pharmacol.* 1972; 8(1): 59-64.
- 714 60. Solá RJ, Griebenow K. Glycosylation of therapeutic proteins: an effective strategy to optimize efficacy.  
715 *BioDrugs.* 2010; 24(1): 9-21.
- 716 61. Ulu A, Ates B. Immobilization of L-asparaginase on carrier materials: a comprehensive review. *Bioconjug*  
717 *Chem.* 2017; 28(6): 1598-1610.
- 718 62. Sharkey I, Boddy AV, Wallace H, Mycroft J, Hollis R, Picton S. Body surface area estimation in children  
719 using weight alone: application in paediatric oncology. *Br J Cancer.* 2001; 85(1): 23-28.
- 720 63. Shifrin S, Parrott CL, Luborsky SW. Substrate binding and intersubunit interactions in L-asparaginase. *J*  
721 *Biol Chem.* 1974; 249(5): 1335-1340.
- 722 64. Stecher AL, de Deus PM, Polikarpov I, Abrahão-Neto J. Stability of L -asparaginase : an enzyme used in  
723 leukemia treatment. *Pharm Acta Helv.* 1999; 74(1): 1-9.

724 65. Todokoro K, Saito T, Obata M, Yamazaki S, Tamaura Y, Inada Y. Studies on conformation and antigenicity  
725 of reduced s-methylated asparaginase in comparison with asparaginase. FEBS Lett. 1975; 60(2): 259-262.  
726

## 727 **Supporting information**

729 **S1 Table. Recovery of site-specific PEGylation performed by ultrafiltration.**

730 **S2 Fig. Densitometry analysis of SDS-PAGE gels.**

731 **S3 Table. Correction of L-asparaginase concentration derived from densitometry analysis.**

732 **S4 Table. Calculation of asparaginase specific catalytic activity.**

733 **S5 Fig. Optimization of secretory expression.**

734 **S6 Fig. Geometrically optimized model structures for C77-105S mutation.**

735 **S7 Table. Geometrically optimized bond lengths and angles of model structures.**

736 **S8 Fig. Purification of recombinant native L-asparaginase.**

737 **S9 Fig. Purification of L-asparaginase mutants.**

738 **S10 Fig. Precursor peptides pattern of the recombinant native L-asparaginase.**

**A**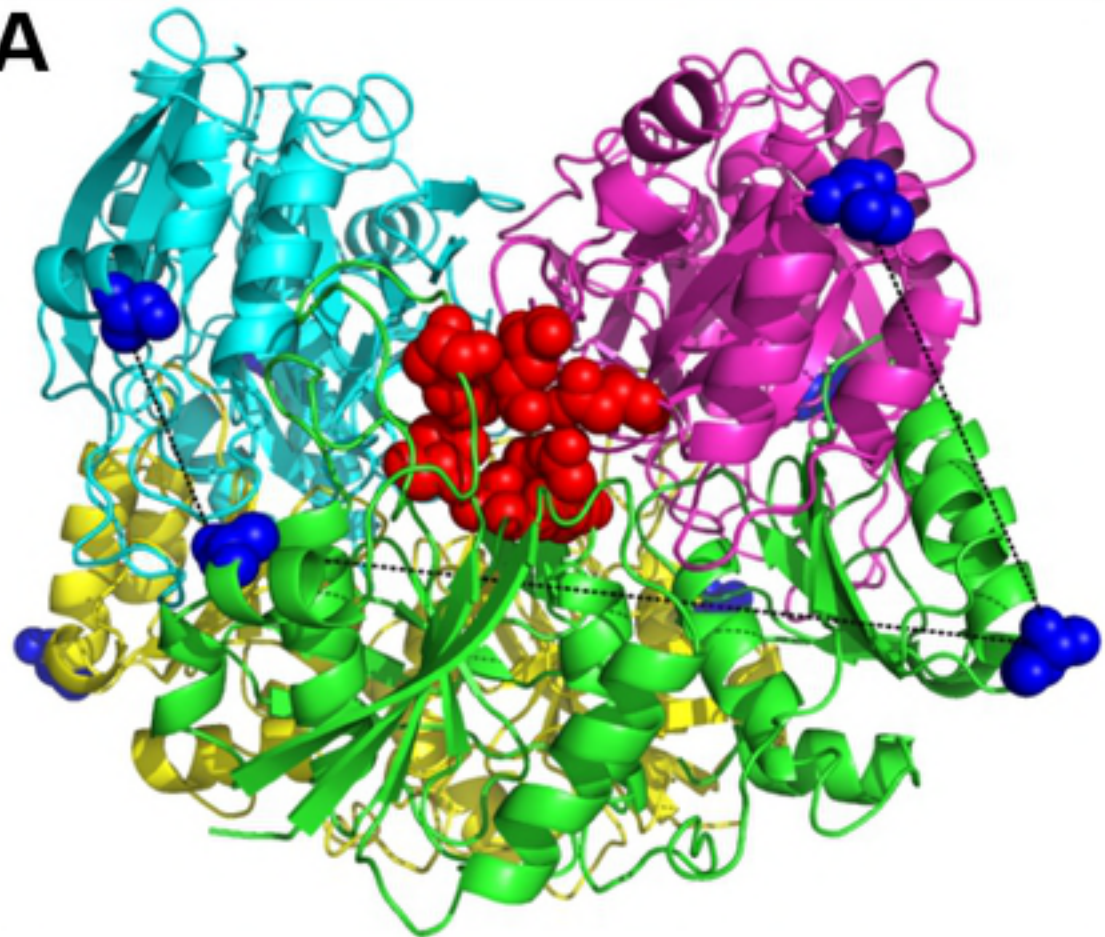**B**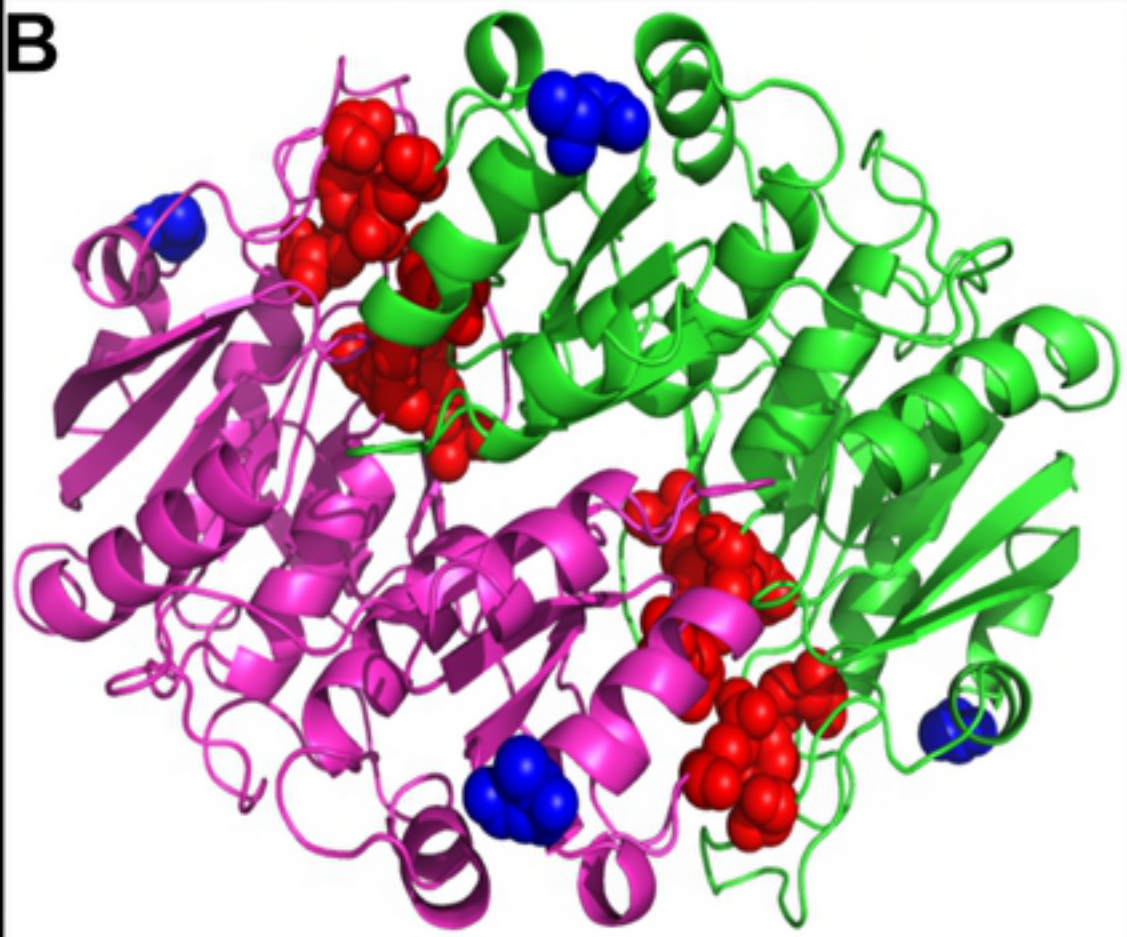



**A**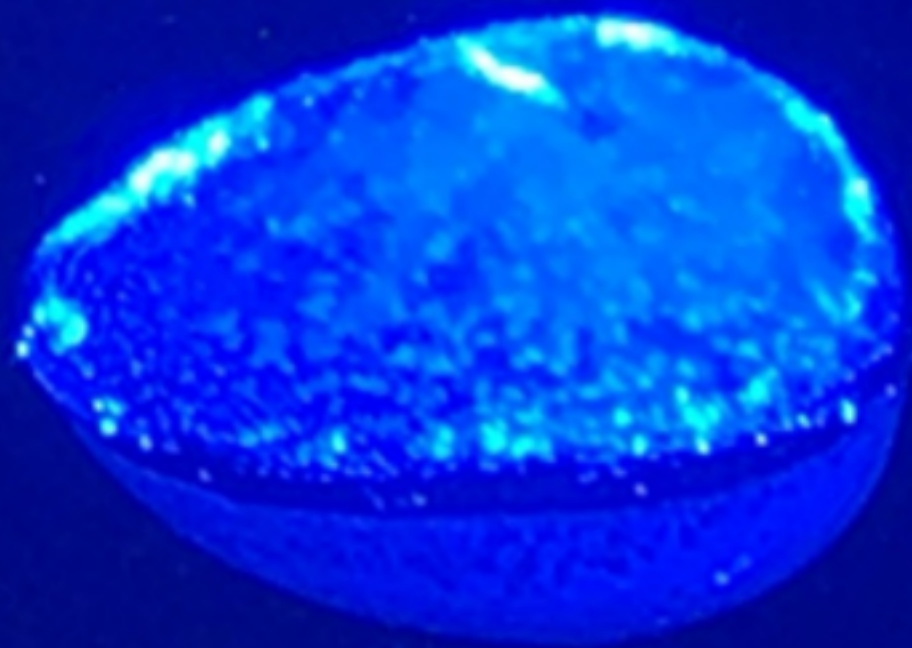**B**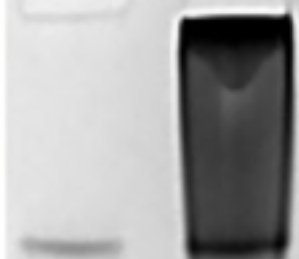**C**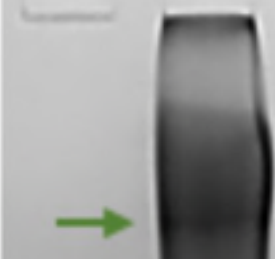

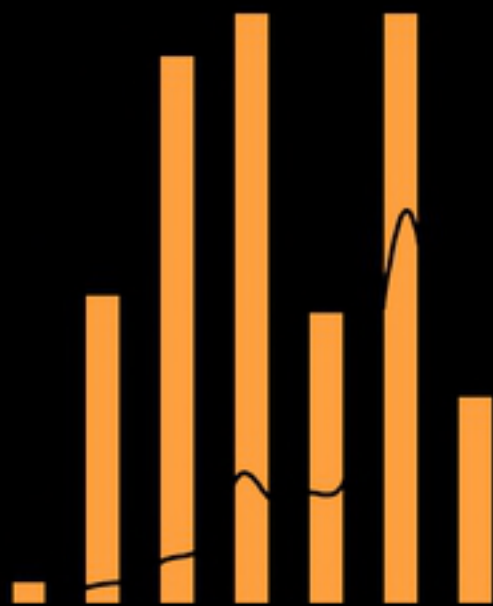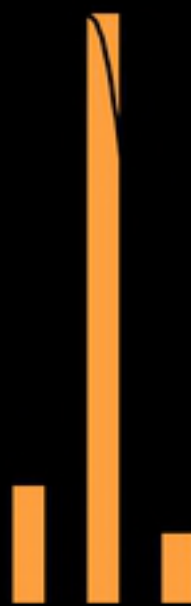





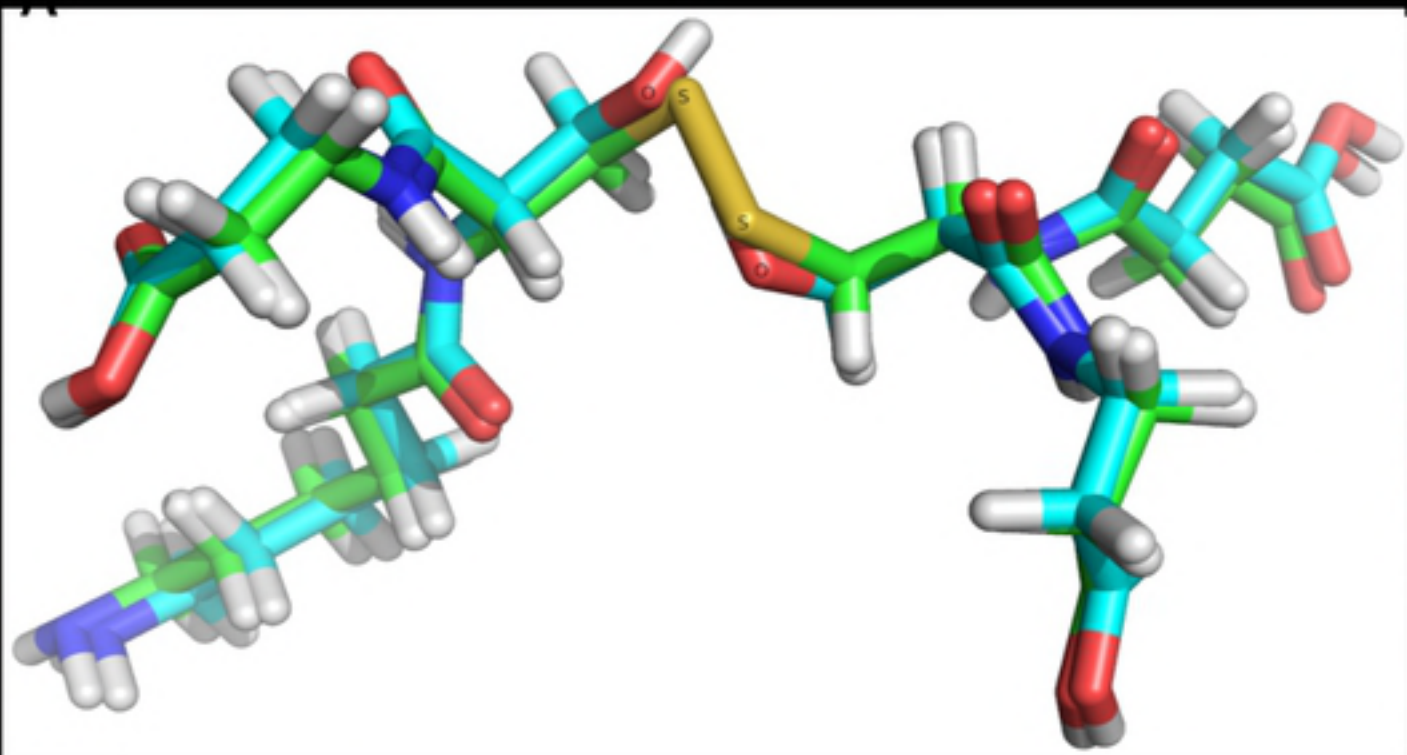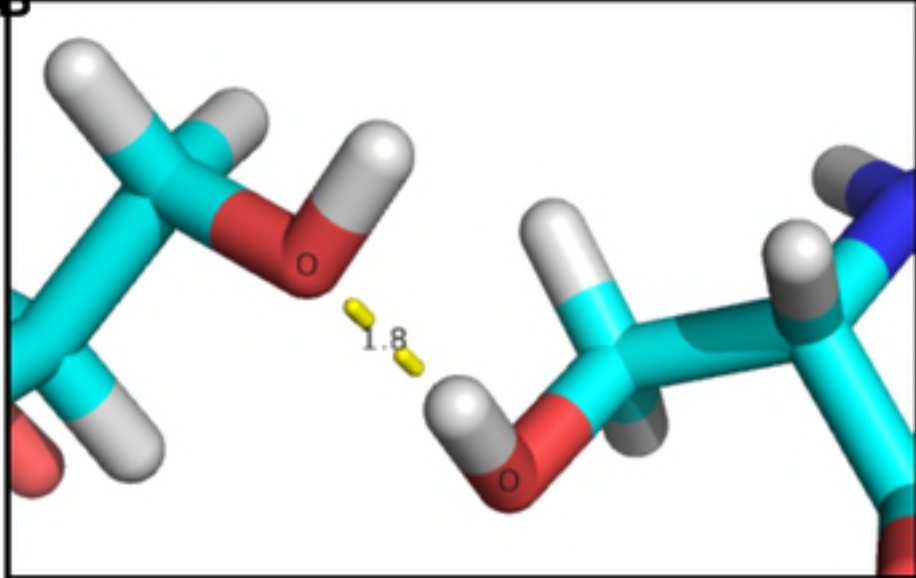

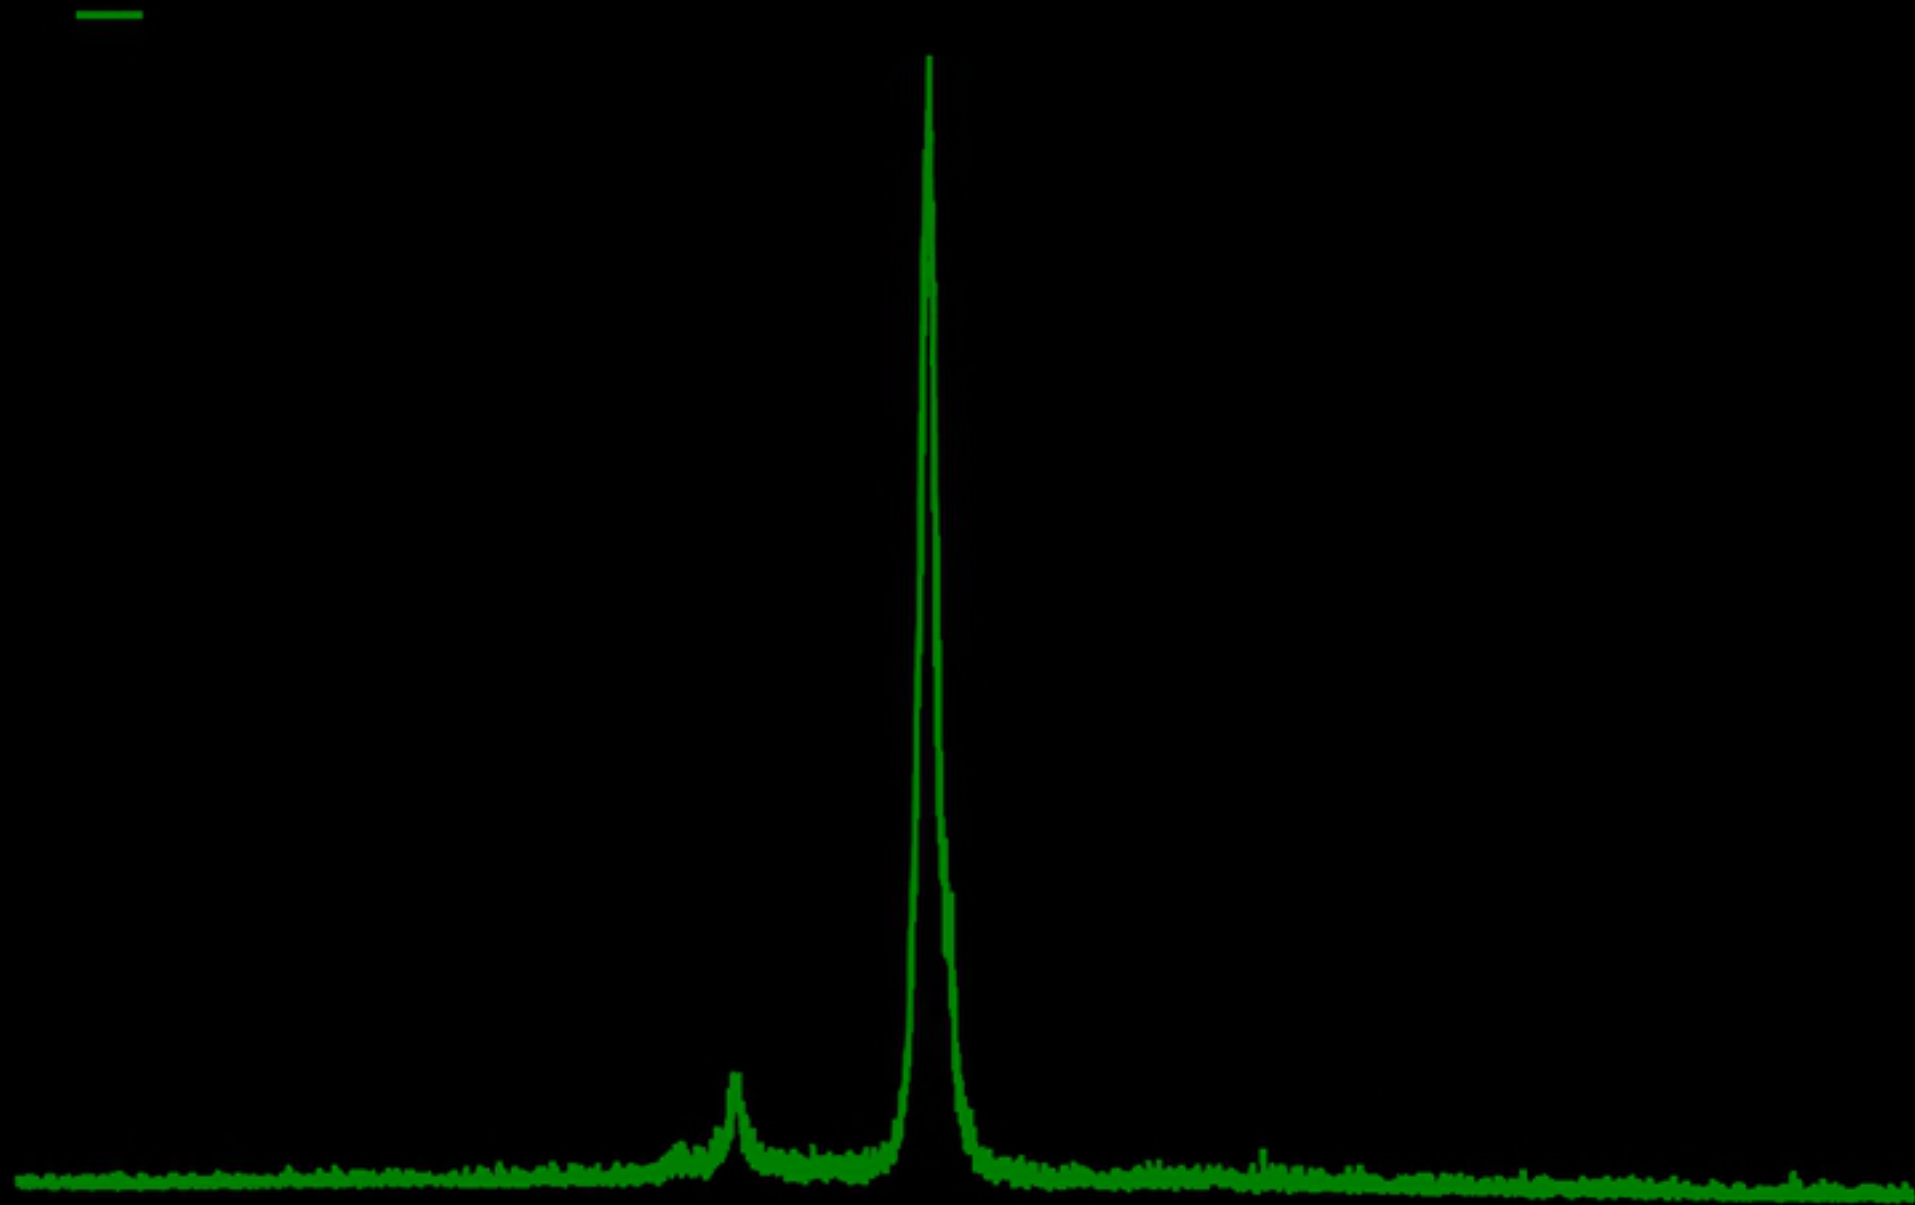

Source: https://www.biorxiv.org/content/10.1101/317040v1.full.pdf
